# Supplementary material for: In silico structure-based discovery of a SARS-CoV-2 main protease inhibitor
Source: PubMed Central journal article supplement (PMC8071767; doi:10.7150/ijbs.59191), 2021-04-10
Supplement: ijbsv17p1555s1.pdf [file ijbsv17p1555s1.pdf]

| ID      | FORMULA       | MOLECULAR WEIGHT | RBOND | NAME                                                                                                                   | GROUP        | COVALENTDOCK | SLIDE  | HBOND | CONTACTS |
|---------|---------------|------------------|-------|------------------------------------------------------------------------------------------------------------------------|--------------|--------------|--------|-------|----------|
| DB12259 | C24H33NO4     | 427.545          | 13    | CG-200745                                                                                                              | experimental | -16.02       | -8.759 | 2     | 85       |
| DB13164 | C26H26N6O2S   | 486.59           | 7     | Olanitrib                                                                                                              | experimental | -15.9        | -7.391 | 0     | 92       |
| DB11907 | C27H26FN7O3   | 555.562          | 9     | Rocletrib                                                                                                              | experimental | -15.78       | -6.75  | 0     | 66       |
| DB15327 | C26H26FN7O2   | 487.539          | 7     | Abivertrib                                                                                                             | experimental | -15.32       | -7.692 | 1     | 84       |
| DB05424 | C24H25OFN5O3  | 485.538          | 9     | Carvartrib                                                                                                             | experimental | -15.17       | -7.375 | 0     | 67       |
| DB09330 | C28H33N7O2    | 499.619          | 10    | Osimeritrib                                                                                                            | approved     | -15          | -8.315 | 1     | 84       |
| DB09053 | C25H24N6O2    | 449.507          | 5     | Ibrutrib                                                                                                               | approved     | -14.97       | -7.487 | 1     | 66       |
| DB15108 | C31H33FN2O5S  | 604.66           | 11    | Tipranavir C-14                                                                                                        | experimental | -14.81       | -8.487 | 0     | 84       |
| DB09211 | C22H36O5      | 389.525          | 13    | Limagrost                                                                                                              | experimental | -14.75       | -7.35  | 2     | 56       |
| DB05616 | C23H22N5O5    | 449.467          | 9     | 4-Methylene-5,8,10-Indeazaaminopterin                                                                                  | experimental | -14.66       | -7.758 | 5     | 57       |
| DB14768 | C19H22CN7O3   | 431.88           | 7     | PF-06459988                                                                                                            | experimental | -14.38       | -6.512 | 1     | 48       |
| DB08964 | C23H38O5      | 394.552          | 13    | Gemprost                                                                                                               | approved     | -14.26       | -7.427 | 1     | 71       |
| DB07325 | C17H19N5O4S   | 389.429          | 5     | N-[2-AMINO-6-METHYLPYRIMIDIN-4-YL]METHYL-3-[(E)-2-OXODIHYDROFURAN-3(2H)-YLIDENE]METHYLAMINO]BENZENSULFONAMIDE          | experimental | -14.18       | -6.512 | 3     | 33       |
| DB12731 | C24H28N3O2    | 391.515          | 8     | Daporinad                                                                                                              | experimental | -13.94       | -8.561 | 1     | 73       |
| DB02545 | C32H36N2O3    | 496.638          | 9     | Fezaramine                                                                                                             | experimental | -13.93       | -8.975 | 3     | 76       |
| DB06334 | C22H19FN4O2   | 390.418          | 6     | Tucidirostat                                                                                                           | experimental | -13.87       | -7.197 | 3     | 81       |
| DB14850 | C34H33B-N6O3  | 653.561          | 7     | Delacozvir                                                                                                             | experimental | -13.75       | -9.122 | 3     | 74       |
| DB15170 | C25H27N5O2    | 429.524          | 7     | Evobudirib                                                                                                             | experimental | -13.7        | -7.355 | 0     | 61       |
| DB13101 | C23H21N5O3S   | 447.51           | 5     | ASC-202                                                                                                                | experimental | -13.63       | -7.124 | 1     | 77       |
| DB09323 | C31H33FN2O5S  | 602.664          | 11    | Tipranavir                                                                                                             | approved     | -13.59       | -7.93  | 0     | 80       |
| DB13019 | C25H28FN4O4   | 468.529          | 5     | Henalib                                                                                                                | experimental | -13.58       | -7.947 | 3     | 60       |
| DB01810 | C22H28N2O5    | 408.4471         | 11    | [1-(1-Methyl-4,5-Dioxo-Pent-2-Erykaramoyl)-2-Phenyl-Ethyl]Carbamic Acid Benzyl Ester                                   | experimental | -13.54       | -7.805 | 1     | 78       |
| DB06330 | C19H19O3      | 294.344          | 6     | METHYL (2Z)-3-METHOXY-2-[(E)-2-PHENYLVINYLPHENYL]ACRYLATE                                                              | experimental | -13.53       | -7.923 | 2     | 77       |
| DB13342 | C20H28N2O6    | 392.452          | 9     | Cinepazet                                                                                                              | experimental | -13.46       | -6.663 | 1     | 60       |
| DB06849 | C22H24N2O2    | 348.432          | 3     | 1-[1'-O-phenylacryloyl]piperidin-1-benzosulfan-3,4'-piperidin-5-yl]methanamine                                         | experimental | -13.42       | -7.05  | 3     | 46       |
| DB13459 | C17H25NO3     | 291.391          | 7     | Paclitacin                                                                                                             | experimental | -13.3        | -7.076 | 1     | 65       |
| DB15149 | C22H22N6O3    | 418.457          | 6     | Futibatinib                                                                                                            | experimental | -13.26       | -7.315 | 1     | 54       |
| DB12428 | C21H22FN3O3S  | 491.48           | 8     | PAC-14026                                                                                                              | experimental | -13.22       | -6.444 | 2     | 64       |
| DB11741 | C23H27FN4O2   | 410.493          | 6     | Famlinib                                                                                                               | experimental | -13.17       | -8.164 | 4     | 57       |
| DB06912 | C15H20O4      | 264.3169         | 12    | UNDECA-3,7-DIENE-1,7,11-TETRACARBALDEHYDE                                                                              | experimental | -13.13       | -6.861 | 1     | 57       |
| DB11672 | C21H20O6      | 368.3799         | 8     | Curcumin                                                                                                               | approved     | -13.13       | -8.304 | 2     | 82       |
| DB05048 | C28H38O6      | 470.606          | 11    | Cannabivir                                                                                                             | experimental | -13.07       | -8.119 | 1     | 75       |
| DB07662 | C17H13B-N4O   | 369.215          | 4     | PD-168333                                                                                                              | experimental | -13.07       | -7.663 | 0     | 58       |
| DB07401 | C22H17N3O5    | 403.3675         | 8     | Azoxytrobin                                                                                                            | experimental | -13.07       | -7.007 | 1     | 49       |
| DB06864 | C20H20B-N5O   | 428.31           | 6     | (2E)-N-[(4-{3-bromophenyl}amino)quinazolin-6-yl]-4-(dimethylamino)but-2-enamide                                        | experimental | -13.05       | -7.347 | 1     | 55       |
| DB07559 | C17H12O2N2O2  | 347.195          | 3     | (2Z)-2-cyano-N-(2,2'-dichlorobiphenyl-4-yl)-3-hydroxybut-2-enamide                                                     | experimental | -13.03       | -7.176 | 2     | 64       |
| DB12123 | C22H31N3O5    | 417.506          | 7     | Cinepazide                                                                                                             | experimental | -13.02       | -7.566 | 1     | 58       |
| DB08169 | C18H16N2O2    | 304.3425         | 4     | (2Z)-N-biphenyl-4-yl-2-cyano-3-cyclopropyl-3-hydroxyprop-2-enamide                                                     | experimental | -13.01       | -7.416 | 1     | 66       |
| DB07561 | C19H18N2O3    | 322.3578         | 5     | (2Z)-2-cyano-N-(3-ethoxybiphenyl-4-yl)-3-hydroxybut-2-enamide                                                          | experimental | -13          | -7.154 | 1     | 71       |
| DB08172 | C18H15CN2O3   | 342.776          | 4     | (2Z)-N-(3-chloro-2-methoxybiphenyl-4-yl)-2-cyano-3-hydroxybut-2-enamide                                                | experimental | -12.91       | -7.412 | 1     | 55       |
| DB06903 | C21H23N3O2    | 349.434          | 7     | Panobinostat                                                                                                           | approved     | -12.9        | -6.681 | 0     | 60       |
| DB05013 | C25H34O6      | 430.541          | 4     | Ingenol mebutate                                                                                                       | approved     | -12.89       | -8.361 | 0     | 70       |
| DB04378 | C22H37O7      | 406.4694         | 3     | 13-Acetylthorol                                                                                                        | experimental | -12.81       | -7.033 | 4     | 47       |
| DB08435 | C20H28O3      | 316.4345         | 11    | (5E,14E)-11-oxoprop-5,9,12,14-tetraen-1-ic acid                                                                        | experimental | -12.74       | -8.44  | 2     | 69       |
| DB07500 | C21H22O4      | 338.397          | 6     | (2E)-1-[2-hydroxy-4-methoxy-5-(3-methylbut-2-en-1-yl)phenyl]-3-(4-hydroxyphenyl)prop-2-en-1-one                        | experimental | -12.73       | -7.755 | 1     | 70       |
| DB09236 | C28H33NO6     | 455.551          | 11    | Lacidipine                                                                                                             | approved     | -12.71       | -7.714 | 1     | 72       |
| DB12392 | C16H19NO4S    | 349.41           | 5     | Resminostat                                                                                                            | experimental | -12.68       | -7.221 | 2     | 60       |
| DB07350 | C18H16N2O3    | 294.3098         | 5     | (2E)-N-hydroxy-3-[1-methyl-4-(phenylacetyl)-1H-pyrrol-2-yl]prop-2-enamide                                              | experimental | -12.66       | -7.364 | 2     | 52       |
| DB08125 | C18H14N4O3S2  | 398.459          | 4     | 4-[(2-Oxo-1,2-dihydro-3H-indol-3-ylidene)methyl]amino-N-(1,3-bisazol-2-yl)benzenesulfonamide                           | experimental | -12.6        | -6.688 | 0     | 57       |
| DB06133 | C23H24O6      | 396.439          | 9     | Dimethylcurcumin                                                                                                       | experimental | -12.58       | -7.6   | 2     | 71       |
| DB04297 | C17H22N2O3    | 302.3682         | 6     | Trichostatin A                                                                                                         | experimental | -12.5        | -7.162 | 2     | 51       |
| DB12253 | C28H20FN2O2   | 446.91           | 6     | GDC-0810                                                                                                               | experimental | -12.47       | -7.467 | 1     | 69       |
| DB12871 | C29H41NO6     | 499.648          | 12    | Beloranib                                                                                                              | experimental | -12.43       | -8.058 | 0     | 76       |
| DB11942 | C17H11FN8O    | 443.313          | 7     | Selinexor                                                                                                              | approved     | -12.38       | -6.099 | 3     | 57       |
| DB03104 | C33H33NO6     | 567.6316         | 10    | 2-[4-[(2-Acetyl-3-oxo-3-[(3S)-2-oxo-1-[4-phenylphenyl]methyl]azepan-3-yl]amino]prop-1-enyl]-2-formylphenyl]acetic acid | experimental | -12.37       | -8.364 | 2     | 68       |
| DB07775 | C19H28B2O6    | 444.028          | 1     | 3',5'-DIBROMO-2',4',6'-TETRAHYDROXY AURONE                                                                             | experimental | -12.36       | -7.619 | 5     | 47       |
| DB12879 | C17H14B-N3O   | 356.223          | 4     | WP 1066                                                                                                                | experimental | -12.32       | -7.854 | 3     | 57       |
| DB05524 | C24H23OFN5O2  | 467.93           | 8     | Pelitinib                                                                                                              | experimental | -12.27       | -6.858 | 2     | 48       |
| DB07443 | C17H14N2O2    | 278.3053         | 3     | (2Z)-N-biphenyl-4-yl-2-cyano-3-hydroxybut-2-enamide                                                                    | experimental | -12.27       | -7.214 | 1     | 64       |
| DB05223 | C20H30N4O2    | 358.486          | 10    | Pracinostat                                                                                                            | experimental | -12.22       | -8.283 | 2     | 66       |
| DB01268 | C22H27FN4O2   | 398.4738         | 7     | Sunitinib                                                                                                              | approved     | -12.21       | -7.205 | 1     | 50       |
| DB08009 | C22H27CN4O2   | 414.928          | 7     | SU-11652                                                                                                               | experimental | -12.2        | -7.825 | 3     | 39       |
| DB07078 | C20H16N2O3    | 332.3528         | 3     | (3Z)-6-(4-HYDROXY-3-METHOXYPHENYL)-3-(1H-PYRROL-2-YLMETHYLENE)-1,3-DIHYDRO-2H-INDOL-2-ONE                              | experimental | -12.18       | -7.372 | 3     | 62       |
| DB03445 | C10H14NO5S    | 302.307          | 8     | (3S)-3-(dioxidosulfanyl)-N-[(1E)-3-oxoprop-1-en-1-yl]-4-(1H-1,2,3-triazol-1-yl)-D-valine                               | experimental | -12.17       | -5.647 | 2     | 22       |
| DB09498 | C19H29O3      | 290.3972         | 10    | Odcinostat                                                                                                             | approved     | -12.09       | -6.932 | 0     | 72       |
| DB03813 | C14H25NO2S    | 271.419          | 11    | 2-Decenoyl-N-Acetyl Cysteamine                                                                                         | experimental | -12.08       | -5.858 | 0     | 65       |
| DB06176 | C24H36N4O6S2  | 540.69           | 2     | Romidepsin                                                                                                             | approved     | -12.05       | -7.012 | 1     | 46       |
| DB02275 | C19H15N3O3    | 261.2765         | 5     | (2-Aminomethyl-6-Oxo-4-(4-Oxo-Cyclohexa-2,5-Dienylmethyl)-4,5-Dihydro-Imidazol-1-yl)-Acetaldehyde                      | experimental | -12.02       | -6.313 | 1     | 31       |
| DB09093 | C13H12Cl2O4   | 303.138          | 6     | Etacrynic acid                                                                                                         | approved     | -12          | -6.098 | 1     | 47       |
| DB14122 | C16H14O4      | 270.284          | 4     | Dihydroxymethoxychalcone                                                                                               | experimental | -11.96       | -7.242 | 2     | 54       |
| DB08753 | C21H21NO5     | 367.3951         | 9     | 4-[(1E)-3-Oxo-3-[(2-PHENYLETHYLAMINO)PROP-1-EN-1-YL]-1,2-PHENYLENE DIACETATE                                           | experimental | -11.96       | -7.692 | 2     | 46       |
| DB08126 | C16H15NO3S    | 357.387          | 3     | 3-[4-[(amino(mino)methyl)ammosulfonyl]amino]methylene]-2-oxo-2,3-dihydro-1H-indole                                     | experimental | -11.93       | -6.891 | 3     | 30       |
| DB14924 | C15H19NSO     | 285.351          | 3     | PF-06651600                                                                                                            | experimental | -11.9        | -5.683 | 2     | 30       |
| DB06741 | C18H12CG2N2O3 | 375.21           | 4     | Gavestinel                                                                                                             | experimental | -11.89       | -7.043 | 3     | 55       |
| DB12207 | C18H12F6N6O   | 442.325          | 7     | Verdineor                                                                                                              | experimental | -11.85       | -6.603 | 3     | 66       |

|         |              |          |    |                                                                                                 |              |        |        |   |    |
|---------|--------------|----------|----|-------------------------------------------------------------------------------------------------|--------------|--------|--------|---|----|
| DB15247 | C23H26FN5O3  | 439.491  | 3  | Vorolanib                                                                                       | experimental | -11.83 | -7.156 | 2 | 63 |
| DB02486 | C24H26O3     | 362.4614 | 4  | BMS-181156                                                                                      | experimental | -11.81 | -8.19  | 2 | 58 |
| DB05197 | C27H30O6     | 450.5235 | 12 | Sofalcone                                                                                       | experimental | -11.8  | -9.211 | 4 | 89 |
| DB05943 | C15H17O5NO4S | 361.81   | 5  | Resatorvid                                                                                      | experimental | -11.79 | -5.836 | 0 | 48 |
| DB06412 | C21H32O3     | 332.484  | 0  | Oxymetholone                                                                                    | approved     | -11.78 | -6.649 | 1 | 35 |
| DB08407 | C24H27NO7    | 441.4737 | 5  | Platensimycin                                                                                   | experimental | -11.74 | -8.199 | 5 | 75 |
| DB07156 | C21H20BN3O2  | 426.306  | 4  | (4Z)-6-bromo-4-[[[4-(pyrrolidin-1-ylmethyl)phenyl]amino]methylidene]squinoline-1,3(2H,4H)-dione | experimental | -11.74 | -8.518 | 1 | 63 |
| DB07615 | C18H17NO5    | 327.3313 | 6  | Tranilast                                                                                       | experimental | -11.68 | -7.194 | 2 | 49 |

|         |               |          |    |  |                                                                                                                                  |              |        |        |   |    |
|---------|---------------|----------|----|--|----------------------------------------------------------------------------------------------------------------------------------|--------------|--------|--------|---|----|
| DB11207 | C15H20O3      | 248.322  | 7  |  | Amiloxate                                                                                                                        | approved     | -11.88 | -6.7   | 1 | 56 |
| DB14635 | C21H20O9S     | 448.44   | 10 |  | Curcumin sulfate                                                                                                                 | experimental | -11.67 | -6.216 | 1 | 35 |
| DB06754 | C17H17NO4     | 299.3212 | 5  |  | N-Cafeyloylramine                                                                                                                | experimental | -11.62 | -7.789 | 3 | 52 |
| DB01641 | C17H19NSO4    | 357.3639 | 5  |  | ((4Z)-2-((1R,2R)-1-Amino-2-hydroxypropyl)-4-((4-amino-1H-indol-3-yl)methyl)amino)-5-oxo-4,5-dihydro-1H-imidazol-1-yl]acetic acid | experimental | -11.6  | -7.865 | 4 | 50 |
| DB06879 | C21H22F2N6O   | 412.4388 | 2  |  | 5-(4'-AMINO-1-ETHYL-5,8-DIFLUORO-1H-SPIRO[PIPERIDINE-4,2-QUINAZOLINE]-1-YL)CARBONYLPICOLINONITRILE                               | experimental | -11.59 | -6.959 | 2 | 46 |
| DB08122 | C16H15N3O3S   | 329.374  | 3  |  | N-Methyl-4-[[2-oxo-1,2-dihydro-3H-indol-3-ylidene]methyl]amino]benzenesulfonamide                                                | experimental | -11.57 | -6.853 | 2 | 32 |
| DB00285 | C15H12O4      | 256.2534 | 3  |  | Isoliquiritigenin                                                                                                                | experimental | -11.53 | -6.876 | 2 | 44 |
| DB07486 | C21H18FN2O2S  | 476.435  | 6  |  | 3-[[4-(1E)-3-morpholin-4-yl-3-oxoprop-1-en-1-yl]-2,3-bis(trifluoromethyl)phenyl]sulfanyl]aniline                                 | experimental | -11.52 | -6.919 | 4 | 40 |
| DB00523 | C20H28O2      | 300.4351 | 5  |  | Allretinoin                                                                                                                      | approved     | -11.51 | -8.138 | 3 | 68 |
| DB12040 | C12H19NO2     | 209.289  | 8  |  | 2-oxyl cyanocrylate                                                                                                              | experimental | -11.5  | -5.614 | 0 | 38 |
| DB12326 | C24H38O4      | 390.564  | 10 |  | Antioquinolol                                                                                                                    | experimental | -11.5  | -7.559 | 2 | 66 |
| DB12029 | C16H18O9      | 354.3067 | 5  |  | Chlorogenic Acid                                                                                                                 | experimental | -11.5  | -8.265 | 6 | 41 |
| DB05915 | C15H14N2O4S   | 316.35   | 4  |  | Belinostat                                                                                                                       | approved     | -11.48 | -6.541 | 2 | 38 |
| DB15086 | C12H19NO2     | 209.2848 | 9  |  | Oxylate                                                                                                                          | experimental | -11.45 | -6.253 | 1 | 35 |
| DB15362 | C25H17F3O4S   | 470.46   | 6  |  | LSZ-102                                                                                                                          | experimental | -11.38 | -6.18  | 2 | 27 |
| DB11219 | C18H22O       | 254.373  | 1  |  | Enzacamene                                                                                                                       | approved     | -11.37 | -7.164 | 0 | 72 |
| DB03834 | C10H13N4O5S   | 301.3    | 8  |  | (3S)-3-(dioxidosulfanyl)-N-[(1Z)-3-oxoprop-1-en-1-yl]-4-(1H-1,2,3-triazol-1-yl)-D-valine                                         | experimental | -11.33 | -5.383 | 3 | 32 |
| DB05187 | C22H24O4S     | 384.49   | 7  |  | Elafibranor                                                                                                                      | experimental | -11.24 | -7.425 | 1 | 53 |
| DB06481 | C15H11F3N2O2  | 308.26   | 5  |  | Manilimus                                                                                                                        | experimental | -11.19 | -5.606 | 0 | 57 |
| DB11367 | C16H19N3O5S   | 365.4    | 5  |  | Cefroxidine                                                                                                                      | experimental | -11.17 | -7.295 | 3 | 50 |
| DB01720 | C22H16BN4O    | 438.271  | 6  |  | (2Z)-2-(Benzylamino)-3-[[4-(2-bromophenoxy)phenyl]acrylic acid                                                                   | experimental | -11.16 | -7.726 | 1 | 49 |
| DB06712 | C16H19NO6     | 385.3707 | 7  |  | Nilvadipine                                                                                                                      | approved     | -11.15 | -5.873 | 1 | 48 |
| DB15467 | C14H18O4      | 250.294  | 8  |  | Cincosate                                                                                                                        | approved     | -11.14 | -6.781 | 2 | 43 |
| DB06864 | C11H12O6      | 240.2004 | 5  |  | 2-(3-CARBOXYPROPYONYL)-6-HYDROXY-CYCLOHEXA-2,4-DIENE CARBOXYLIC ACID                                                             | experimental | -11.08 | -6.293 | 3 | 28 |
| DB12582 | C17H19NO3     | 285.3377 | 3  |  | Piperine                                                                                                                         | experimental | -11.03 | -7.358 | 0 | 58 |
| DB11806 | C24H32O2      | 352.518  | 4  |  | VTP-184204                                                                                                                       | experimental | -10.98 | -8.222 | 1 | 57 |
| DB12072 | C18H18NO3     | 310.3471 | 4  |  | Oraninib                                                                                                                         | experimental | -10.95 | -7.227 | 1 | 44 |
| DB06862 | C16H18ON4O4S  | 355.836  | 5  |  | 1-METHYL ETHYL 1-CHLORO-5-[[5,6Dihydro-2-methyl-1,4-oxathin-3-yl]carbonyl]amino]benzoate                                         | experimental | -10.92 | -6.559 | 0 | 61 |
| DB08110 | C14H19NO4     | 265.306  | 4  |  | (1R,4S,7AS)-1-(1-FORMYLPROP-1-EN-1-YL)-4-METHOXY-2,4,6,6,7A-HEXAHYDRO-1H-INDOLE-3-CARBOXYLIC ACID                                | experimental | -10.88 | -6.861 | 2 | 31 |
| DB12223 | C12H18O4      | 228.272  | 8  |  | Squaric acid dibutyl ester                                                                                                       | experimental | -10.87 | -5.917 | 1 | 36 |
| DB12397 | C11H13NO2     | 191.23   | 4  |  | Idroclamide                                                                                                                      | experimental | -10.85 | -6.321 | 2 | 39 |
| DB07838 | C17H12N2O4S2  | 372.418  | 4  |  | (Z)-3-BENZYL-5-(2-HYDROXY-3-NITROBENZYLIDENE)-2-THIOXATHAZOLIDIN-4-ONE                                                           | experimental | -10.81 | -6.752 | 0 | 60 |
| DB11962 | C18H11N3O2S   | 333.37   | 2  |  | GSK-1059615                                                                                                                      | experimental | -10.8  | -7.063 | 0 | 42 |
| DB00285 | C13H17NO      | 203.2802 | 3  |  | Cotnamilon                                                                                                                       | approved     | -10.8  | -6.523 | 0 | 39 |
| DB12358 | C8H11NO2      | 153.1784 | 5  |  | Enbutazlate                                                                                                                      | experimental | -10.78 | -5.814 | 1 | 30 |
| DB12830 | C9H13NO2      | 167.208  | 5  |  | Isopentyl 2-cyanoacrylate                                                                                                        | experimental | -10.75 | -5.083 | 0 | 27 |
| DB15359 | C21H22O5      | 354.3984 | 6  |  | Xanthhumol                                                                                                                       | experimental | -10.73 | -6.572 | 2 | 33 |
| DB07317 | C11H11NO2     | 189.2105 | 2  |  | (3E)-3-[[phenylamino]methylidene]hydrofuran-2(3H)-one                                                                            | experimental | -10.72 | -5.691 | 0 | 31 |
| DB06881 | C8H11O6P      | 210.1217 | 5  |  | (1Z)-2-HYDROXY-3-OXOHEX-1-EN-1-YL DIHYDROGEN PHOSPHATE                                                                           | experimental | -10.71 | -5.086 | 3 | 17 |
| DB14783 | C11H13NO6     | 255.228  | 7  |  | Diroximil fumarate                                                                                                               | approved     | -10.63 | -6.301 | 2 | 40 |
| DB13063 | C15H20O3      | 248.3175 | 0  |  | Paribenzotide                                                                                                                    | approved     | -10.63 | -6.655 | 0 | 41 |
| DB07180 | C17H16ON3O2   | 329.781  | 2  |  | 5-[(Z)-(5-Chloro-2-oxo-1,2-dihydro-3H-indol-3-ylidene)methyl]-N1,2,4-trimethyl-1H-pyrimido-3-carboxamide                         | experimental | -10.62 | -6.774 | 2 | 31 |
| DB01322 | C14H18O3      | 232.275  | 3  |  | Kava                                                                                                                             | approved     | -10.59 | -6.878 | 1 | 54 |
| DB02892 | C8H13NO4      | 187.1931 | 6  |  | L-2-Amino-6-Methylene-Pimelic Acid                                                                                               | experimental | -10.58 | -5.781 | 2 | 19 |
| DB12150 | C16H18O3      | 258.317  | 3  |  | Pelubiprofen                                                                                                                     | experimental | -10.47 | -7.156 | 1 | 52 |
| DB06880 | C12H9F3N2O2   | 270.2073 | 3  |  | Terflunomide                                                                                                                     | approved     | -10.4  | -5.447 | 1 | 41 |
| DB04164 | C13H17NO8     | 315.276  | 3  |  | 1,4-Dioxy-4-((5-Hydroxymethyl)-2,3,4-Trihydroxydihex-5-Enyl)Amino]Fructose                                                       | experimental | -10.38 | -5.708 | 3 | 31 |
| DB07911 | C12H9O4       | 217.1975 | 5  |  | (3E)-2,6-DIOXO-6-PHENYLX-3-ENoATE                                                                                                | experimental | -10.36 | -6.034 | 0 | 39 |
| DB06039 | C19H21N3O3S   | 371.453  | 2  |  | (3Z)-N,N-DIMETHYL-2-OXO-3-(4,5,6,7-TETRAHYDRO-1H-INDOL-2-YL)METHYLENE)-2,3-DIHYDRO-1H-INDOLE-5-SULFONAMIDE                       | experimental | -10.33 | -7.666 | 3 | 53 |
| DB15590 | C22H20O7      | 386.356  | 4  |  | beta-Agopropogodyllin                                                                                                            | experimental | -10.32 | -6.126 | 0 | 39 |
| DB05171 | C25H28FN3O2   | 419.5    | 5  |  | E-2012                                                                                                                           | experimental | -10.32 | -7.873 | 1 | 54 |
| DB06396 | C14H14N2O4    | 274.276  | 6  |  | 4-[[Z]-5-oxo-2-phenyl-1,3-oxazol-4(5H)-ylidene]methyl]amino]butanoic acid                                                        | experimental | -10.3  | -6.813 | 4 | 31 |
| DB12017 | C13H12N2O2    | 228.251  | 4  |  | Ozagrel                                                                                                                          | experimental | -10.27 | -6.991 | 1 | 32 |
| DB14175 | C14H18O       | 202.2921 | 6  |  | alpha-Amyl cinnamaldehyde                                                                                                        | approved     | -10.24 | -6.784 | 1 | 38 |
| DB05767 | C20H30O5      | 350.455  | 3  |  | Androgapholide                                                                                                                   | experimental | -10.17 | -6.9   | 1 | 42 |
| DB03211 | C5H9O4P       | 164.0963 | 4  |  | (3-Formyl-but-3-Enyl) Phosphonic Acid                                                                                            | experimental | -10.14 | -5.428 | 2 | 3  |
| DB03626 | C18H17NO4     | 311.3319 | 4  |  | 5-Methoxy-1,2-Dimethyl-3-(Phenoxy)methyl]indole-4,7-Dione                                                                        | experimental | -10.12 | -6.522 | 0 | 57 |
| DB04227 | C11H11N2O7    | 290.2698 | 5  |  | 9-Amino-2-deoxy-2,3-dehydro-n-acetyl-neuraminic acid                                                                             | experimental | -10.08 | -6.801 | 7 | 22 |
| DB13331 | C9H13NO2      | 167.208  | 2  |  | Pythylidone                                                                                                                      | experimental | -10.08 | -5.493 | 1 | 31 |
| DB13214 | C11H14N2O3S   | 254.3    | 2  |  | Sulfidicramide                                                                                                                   | experimental | -9.98  | -6.327 | 4 | 41 |
| DB03903 | C28H25N3O5    | 483.5152 | 5  |  | Tetr                                                                                                                             | experimental | -9.96  | -7.742 | 1 | 43 |
| DB11285 | C12H14O4      | 222.2372 | 5  |  | Ethyl ferulate                                                                                                                   | approved     | -9.95  | -6.09  | 1 | 36 |
| DB07819 | C9H8ClNO2     | 197.618  | 2  |  | (2E)-3-(4-CHLOROPHENYL)-N-HYDROXYACRYLAMIDE                                                                                      | experimental | -9.93  | -5.553 | 0 | 26 |
| DB00982 | C20H28O2      | 300.4351 | 5  |  | Isotretinoin                                                                                                                     | approved     | -9.88  | -7.334 | 0 | 55 |
| DB06436 | C15H14N2O     | 238.2845 | 1  |  | Semaxanib                                                                                                                        | experimental | -9.87  | -7.401 | 1 | 37 |
| DB07818 | C9H7Cl2NO2    | 232.063  | 2  |  | (2E)-3-(2-DICHLOROPHENYL)-N-HYDROXYACRYLAMIDE                                                                                    | experimental | -9.85  | -5.72  | 1 | 25 |
| DB05974 | C20H24O4      | 328.406  | 8  |  | Transrocetfame                                                                                                                   | experimental | -9.82  | -7.049 | 1 | 40 |
| DB15138 | C25H25F3N2O2  | 442.482  | 5  |  | AZD-8496                                                                                                                         | experimental | -9.81  | -7.121 | 2 | 35 |
| DB01793 | C17H10Cl2N2O4 | 377.178  | 4  |  | SB-409513                                                                                                                        | experimental | -9.76  | -5.18  | 1 | 49 |
| DB00755 | C20H28O2      | 300.442  | 5  |  | Tretinoin                                                                                                                        | approved     | -9.71  | -6.653 | 0 | 61 |
| DB02400 | C18H16N2O6    | 356.3294 | 5  |  | ES-936                                                                                                                           | experimental | -9.61  | -6.027 | 1 | 42 |
| DB07978 | C20H10F7N4O   | 461.2865 | 6  |  | 2-[[[2,3,5,6-TETRAFLUORO-3-(TRIFLUOROMETHOXY)BIPHENYL-4-YL]AMINO]CARBONYL]CYCLOPENTA-1,3-DIENE-1-CARBOXYLIC ACID                 | experimental | -9.61  | -6.692 | 2 | 56 |
| DB07529 | C9H7N3O5      | 205.236  | 1  |  | (3E)-2-Amino-5-(2-syridinyl)methylene)-1,3-thiazol-4(3H)-one                                                                     | experimental | -9.58  | -5.832 | 1 | 39 |
| DB04085 | C10H8N2O5     | 236.1809 | 4  |  | Bis[N-maleimidomethyl]ether                                                                                                      | experimental | -9.54  | -5.045 | 0 | 24 |
| DB07636 | C14H17NO3S    | 279.35   | 6  |  | 5-Heptyl-6-hydroxy-1,3-benzothiazole-4,7-dione                                                                                   | experimental | -9.49  | -6.166 | 0 | 64 |
| DB02781 | C16H15N2O4S   | 331.366  | 7  |  | 4-[(Z)-[2-[3-(Methylsulfanyl)Propoxy]-5-Oxo-1-(2-Oxoethyl)-1,5-Dihydro-4h-Imidazol-4-Ylidene]Methyl]Benzenolate                  | experimental | -9.48  | -7.31  | 1 | 43 |

|         |              |          |    |                                                                                                                                                |              |       |        |   |    |
|---------|--------------|----------|----|------------------------------------------------------------------------------------------------------------------------------------------------|--------------|-------|--------|---|----|
| DB08186 | C13H13NO     | 199.2484 | 2  | (3E)-4-(1-METHYL-1H-INDOL-3-YL)BUT-3-EN-2-ONE                                                                                                  | experimental | -9.46 | -7.328 | 3 | 41 |
| DB04769 | C12H7N3O2S   | 257.269  | 1  | 5-QUINOXALIN-6-YLMETHYLENE-THIAZOLIDINE-2,4-DIONE                                                                                              | experimental | -9.45 | -6.747 | 1 | 36 |
| DB13504 | C14H15N5O5S2 | 397.42   | 5  | Cefetamet                                                                                                                                      | experimental | -9.38 | -5.846 | 2 | 36 |
| DB02816 | C10H10N4O3S  | 269.276  | 3  | 7-(1-Methyl-1,2,3-Triazol-4-yl)-6-Formyl-2,7-Dihydro-[1,4]Thiazepine-3-Carboxylic Acid, BR42715, C6-(N1-Methyl-1,2,3-Triazolyl)methylene/Perem | experimental | -9.33 | -6.031 | 3 | 28 |
| DB15201 | C24H28O4     | 380.484  | 10 | Nortixin                                                                                                                                       | experimental | -9.33 | -7.46  | 1 | 25 |
| DB01332 | C13H13N5O5S2 | 383.403  | 5  | Ceftazoxime                                                                                                                                    | approved     | -9.32 | -6.412 | 3 | 26 |
| DB03428 | C13H11N3O2   | 241.2453 | 2  | SUS516                                                                                                                                         | experimental | -9.31 | -5.536 | 1 | 25 |
| DB07516 | C12H9ClO4    | 252.65   | 4  | (2Z,4E)-3-chloro-2-hydroxy-6-oxo-6-phenylhexa-2,4-dienoic acid                                                                                 | experimental | -9.29 | -5.798 | 1 | 46 |
| DB04657 | C12H13NO2S   | 235.302  | 2  | Carboxin                                                                                                                                       | approved     | -9.28 | -6.181 | 1 | 59 |
| DB04347 | C7H8O5       | 172.1354 | 1  | 3-Dehydroshikimate                                                                                                                             | experimental | -9.25 | -6.179 | 4 | 24 |
| DB03991 | C11H17NO6    | 291.2546 | 5  | 2-deoxy-2,3-dehydro-N-acetylneuraminic acid                                                                                                    | experimental | -9.25 | -6.321 | 7 | 26 |
| DB07960 | C12H19NO6    | 273.2824 | 5  | 5-ACETAMIDO-5,6-DIHYDRO-4-HYDROXY-6-ISOBUTOXY-4H-PYRAN-2-CARBOXYLIC ACID                                                                       | experimental | -9.23 | -6.25  | 5 | 24 |
| DB07503 | C11H9F2NO4S  | 285.224  | 1  | (8E)-5-(2,2-DIFLUORO-1,3-BENZODI(OXOL-5-YL)METHYLENE)-1,3-THIAZOLIDINE-2,4-DIONE                                                               | experimental | -9.19 | -4.93  | 0 | 23 |
| DB03321 | C11H18N2O7   | 290.2698 | 5  | Des(carbamimidoyl) zanamivir                                                                                                                   | experimental | -9.09 | -6.255 | 6 | 18 |
| DB06587 | C11H12O5     | 224.21   | 4  | Sinapic acid                                                                                                                                   | experimental | -9.09 | -5.871 | 1 | 21 |
| DB03981 | C8H8O9S      | 256.187  | 3  | 1,4-Dideoxy-5-Dehydro-O2-Sulfo-Glucuronic Acid                                                                                                 | experimental | -9.06 | -6.357 | 6 | 17 |
| DB14184 | C9H8O        | 132.1592 | 2  | Cinnamaldehyde                                                                                                                                 | approved     | -9.05 | -6.323 | 1 | 32 |
| DB07788 | C19H22O7     | 362.3738 | 1  | (3R,5Z,8S,9S,11E)-8,9,16-TRIHYDROXY-14-METHOXY-3-METHYL-3,4,9,10-TETRAHYDRO-1H-2-BENZOXACYCLO-TETRADECINE-1,7(8H)-DIONE                        | experimental | -9.02 | -5.879 | 0 | 35 |
